# Supplementary material
Source: PubMed Central journal article supplement (PMC4334370)

## Supplementary Figure 1

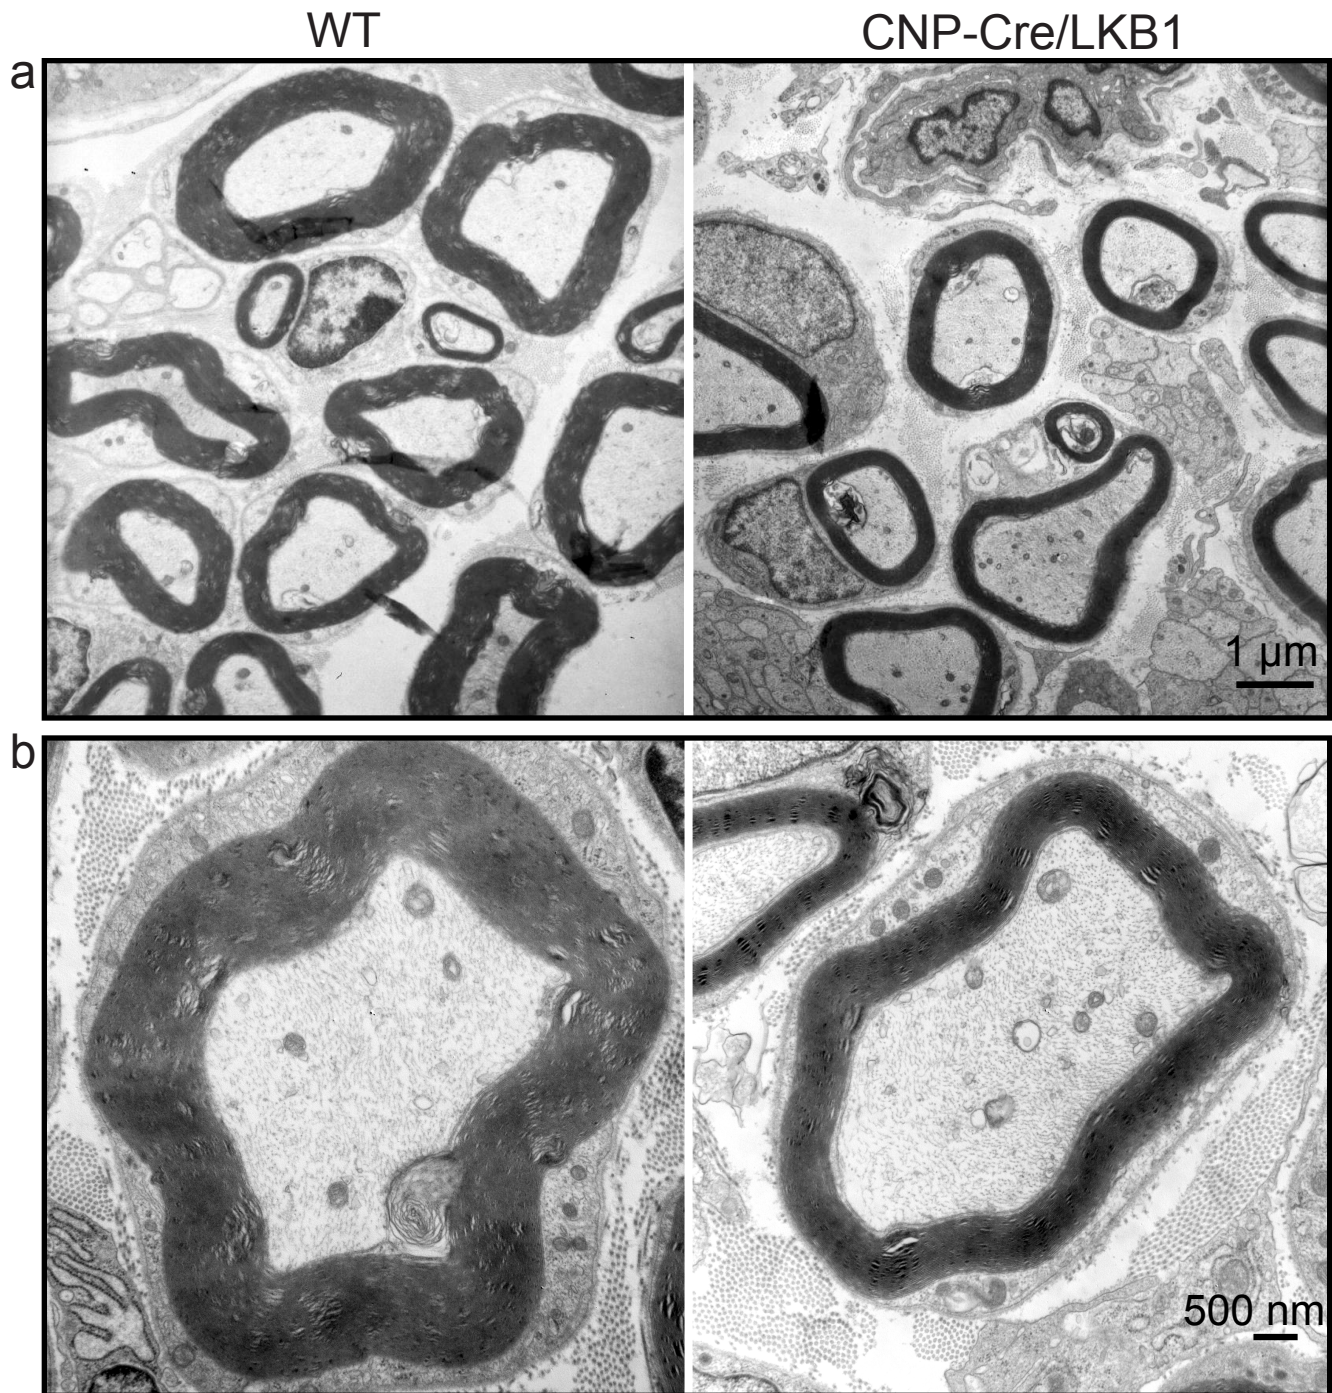

**Supplementary Figure 1. SC-specific knockout of LKB1 alters myelin extent.** (a) The sciatic nerves from SC-specific LKB1 KO and WT littermate mice at 60 days postnatal were isolated and processed for electron microscopy. Scale bar = 1.0  $\mu\text{m}$ . (b) High magnification electron micrographs of sciatic nerves from SC-specific LKB1 KO and WT mice at 60 days postnatal. Scale bar = 500 nm.

## Supplementary Figure 2

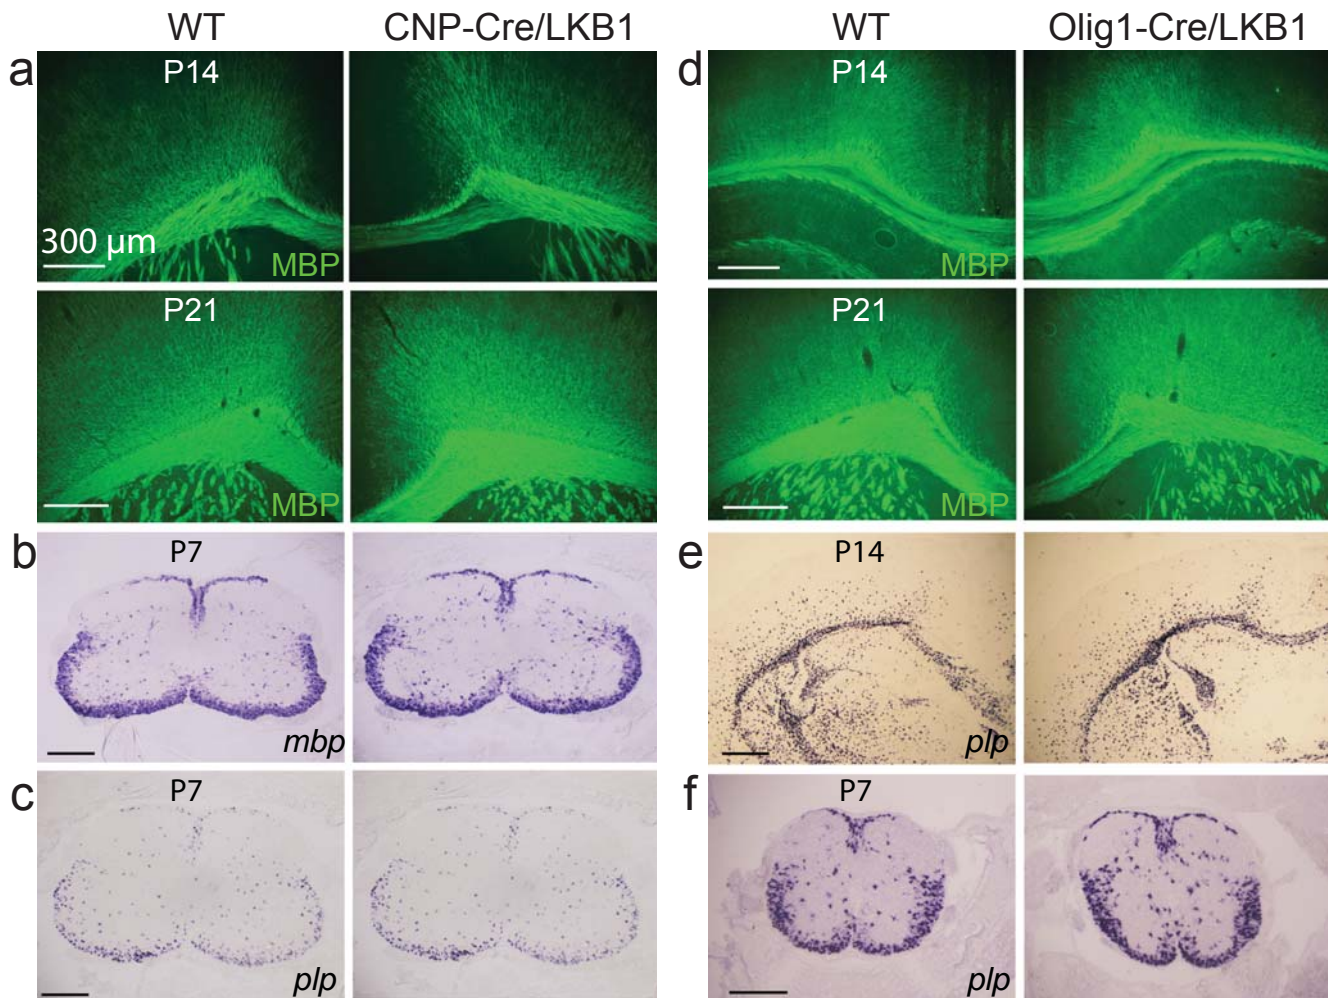

**Supplementary Figure 2. OPC-specific knockout of LKB1 does not alter developmental differentiation or myelination.** (a) The brains from CNP-Cre LKB1 KO and WT littermate mice at postnatal days 14 and 21 were isolated and processed for MBP immunostaining. (b, c) In situ hybridization of *mbp* and *plp* were performed on brain sections from CNP-Cre LKB1 KO mice at 7 days postnatal to determine changes in oligodendrocyte differentiation. (d) MBP immunostaining of brains from Olig1-Cre LKB1 KO and WT littermate mice at postnatal days 14 and 21. (e) In situ hybridization of *plp* were performed on brain sections from Olig1-Cre LKB1 KO mice at 14 days postnatal to determine changes in oligodendrocyte differentiation. (f) In situ hybridization of *plp* was performed on spinal cord sections from Olig1-Cre LKB1 KO mice at 7 days postnatal to determine changes in oligodendrocyte differentiation. All scale bars = 300 μm.

# Supplementary Figure 3

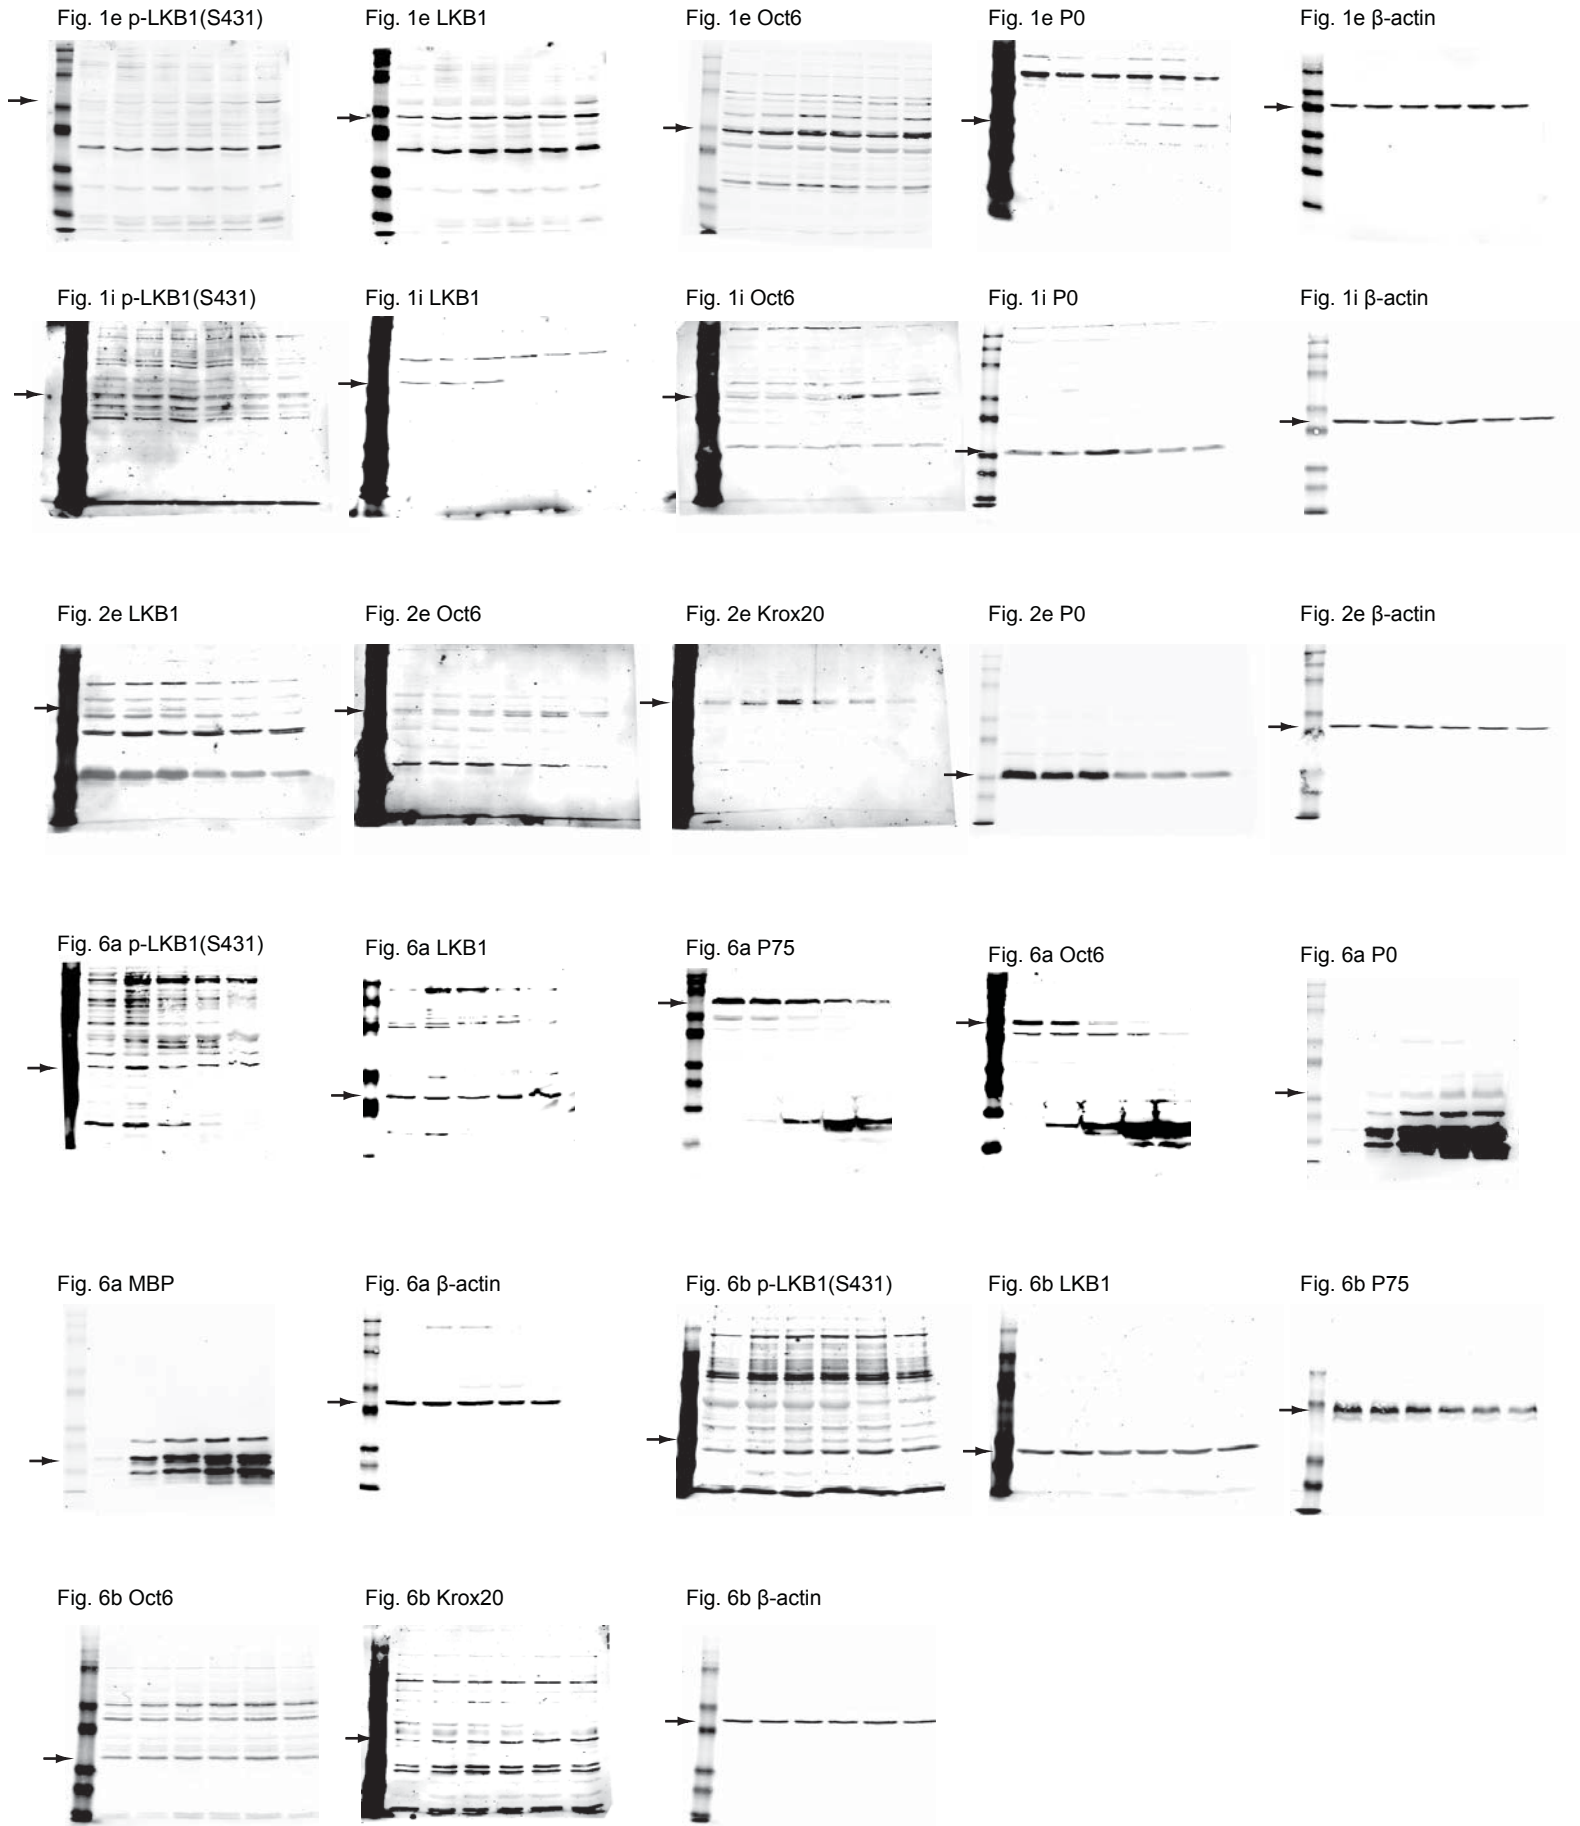

Supplement: NIHMS621391-supplement-1.pdf [file NIHMS621391-supplement-1.pdf]
